# Supplementary material for: Identification of a new curcumin synthase from ginger and construction of a curcuminoid-producing unnatural fusion protein diketide-CoA synthase::curcumin synthase
Source: Royal Society of Chemistry journal article supplement (doi:10.1039/c5ra23401h), 2016-01-01

## Supplementary Information

### S1. Primers used for PCR amplification

| Gene                      | Primer sequence (5' to 3')                                                             |
|---------------------------|----------------------------------------------------------------------------------------|
| CURS (forward)            | <u>CGCGGATCC</u> ATGGGTAGCCTGCAGGCGATG (the <i>Bam</i> HI site is underlined)          |
| CURS (reverse)            | <u>CCCAAGCTT</u> CTACGGTATTGGTAGACTGCGTAGCACG (the <i>Hind</i> III site is underlined) |
| DCS (forward)             | <u>CGCGGATCC</u> ATGGAAGCGAACGGCTACCGCATAACTC (the <i>Bam</i> HI site is underlined)   |
| DCS (reverse)             | <u>CCCAAGCTT</u> CTAGTTCAGTCTGCAACTATGGAGGACG (the <i>Hind</i> III site is underlined) |
| DCS-Gly-Ser-Gly(reverse)  | CGCCTGCAGGCTACCCATGCCAGATCCGTTTCAGTTTGCAACTATG                                         |
| CURS-Gly-Ser-Gly(forward) | CATAGTTGCAAACTGAACGGATCTGGCATGGGTAGCCTGCAGGCG                                          |
| DCS::CURS (forward)       | <u>CGCGGATCC</u> ATGGAAGCGAACGGCTACCGCATAACTC (the <i>Bam</i> HI site is underlined)   |
| DCS::CURS (reverse)       | <u>CCCAAGCTT</u> CTACGGTATTGGTAGACTGCGTAGCACG (the <i>Hind</i> III site is underlined) |

**S2.** SDS-PAGE for His-tagged recombinant proteins: Markers (lane Mr); DCS (lane 1); CURS (lane 2); DCS::CURS (lane 3).

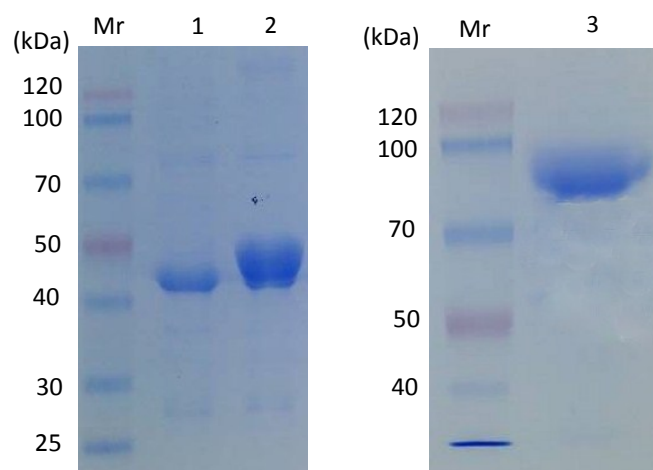

**S3** HPLC chromatograms, UV, and MS data of the reaction products produced by DCS::CURS from malonyl-CoA and varied substrates (A) feruloyl-CoA ( $A_{360}$  nm), (B) 4-coumaroyl-CoA ( $A_{360}$  nm).

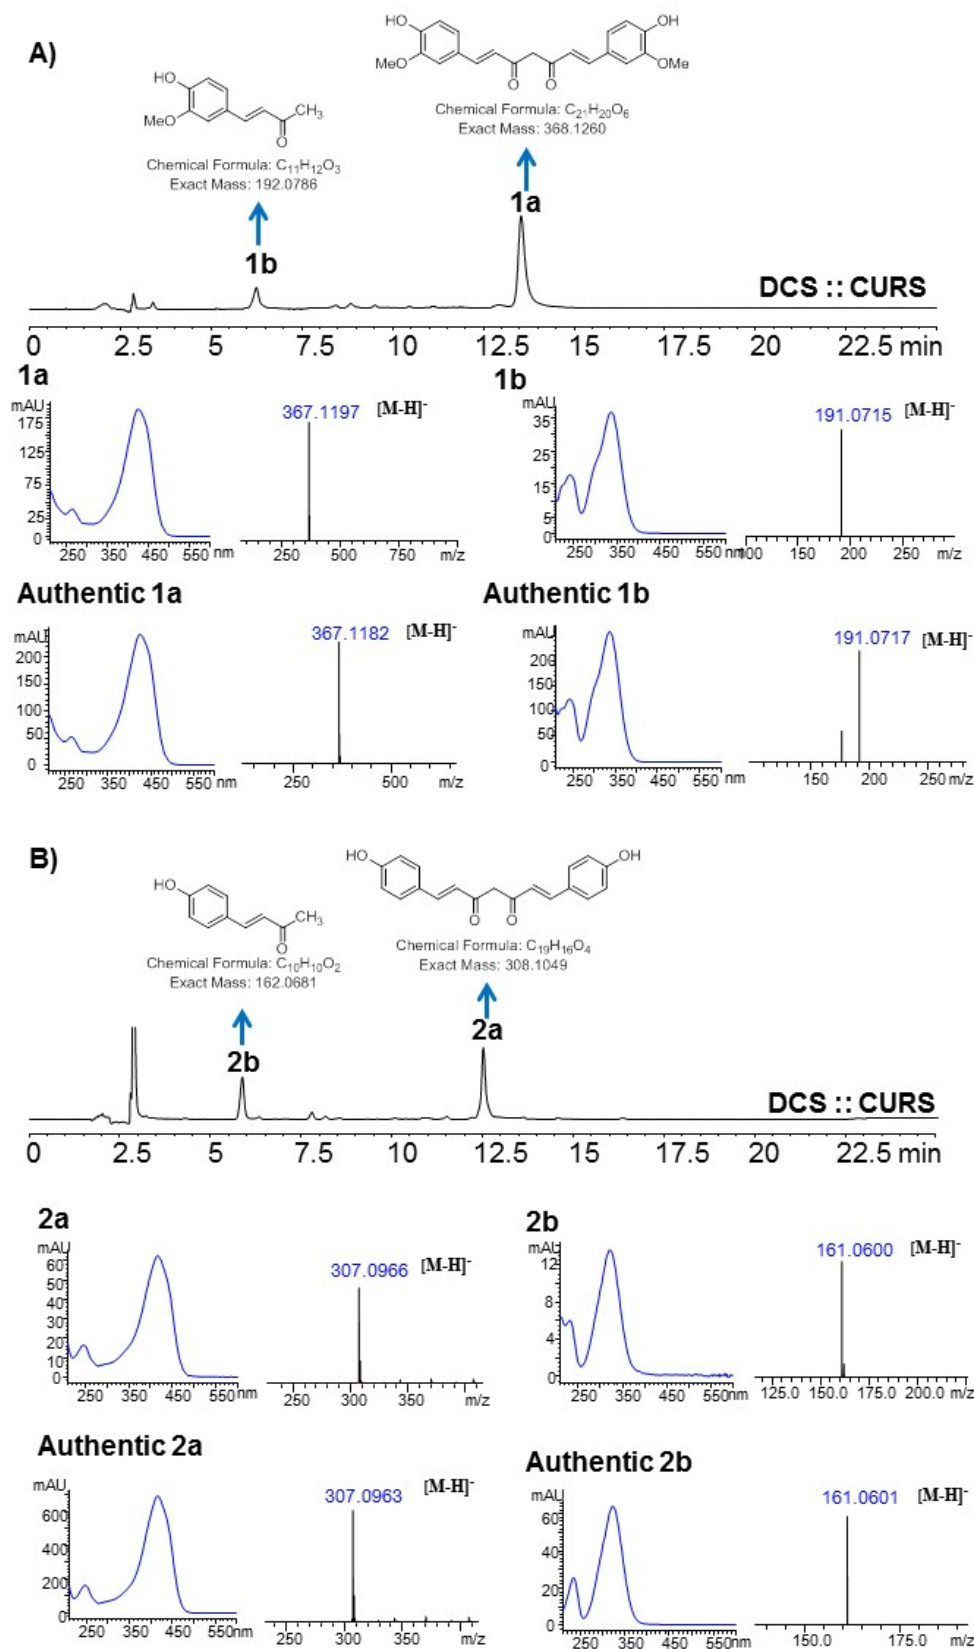

**S4** HPLC chromatograms, UV, and MS data of the reaction products produced by DCS::CURS from malonyl-CoA and varied substrates (A) cinnamoyl-CoA ( $A_{360}$  nm), and (B) 3-(4-hydroxyphenyl) propionyl-CoA ( $A_{280}$  nm).

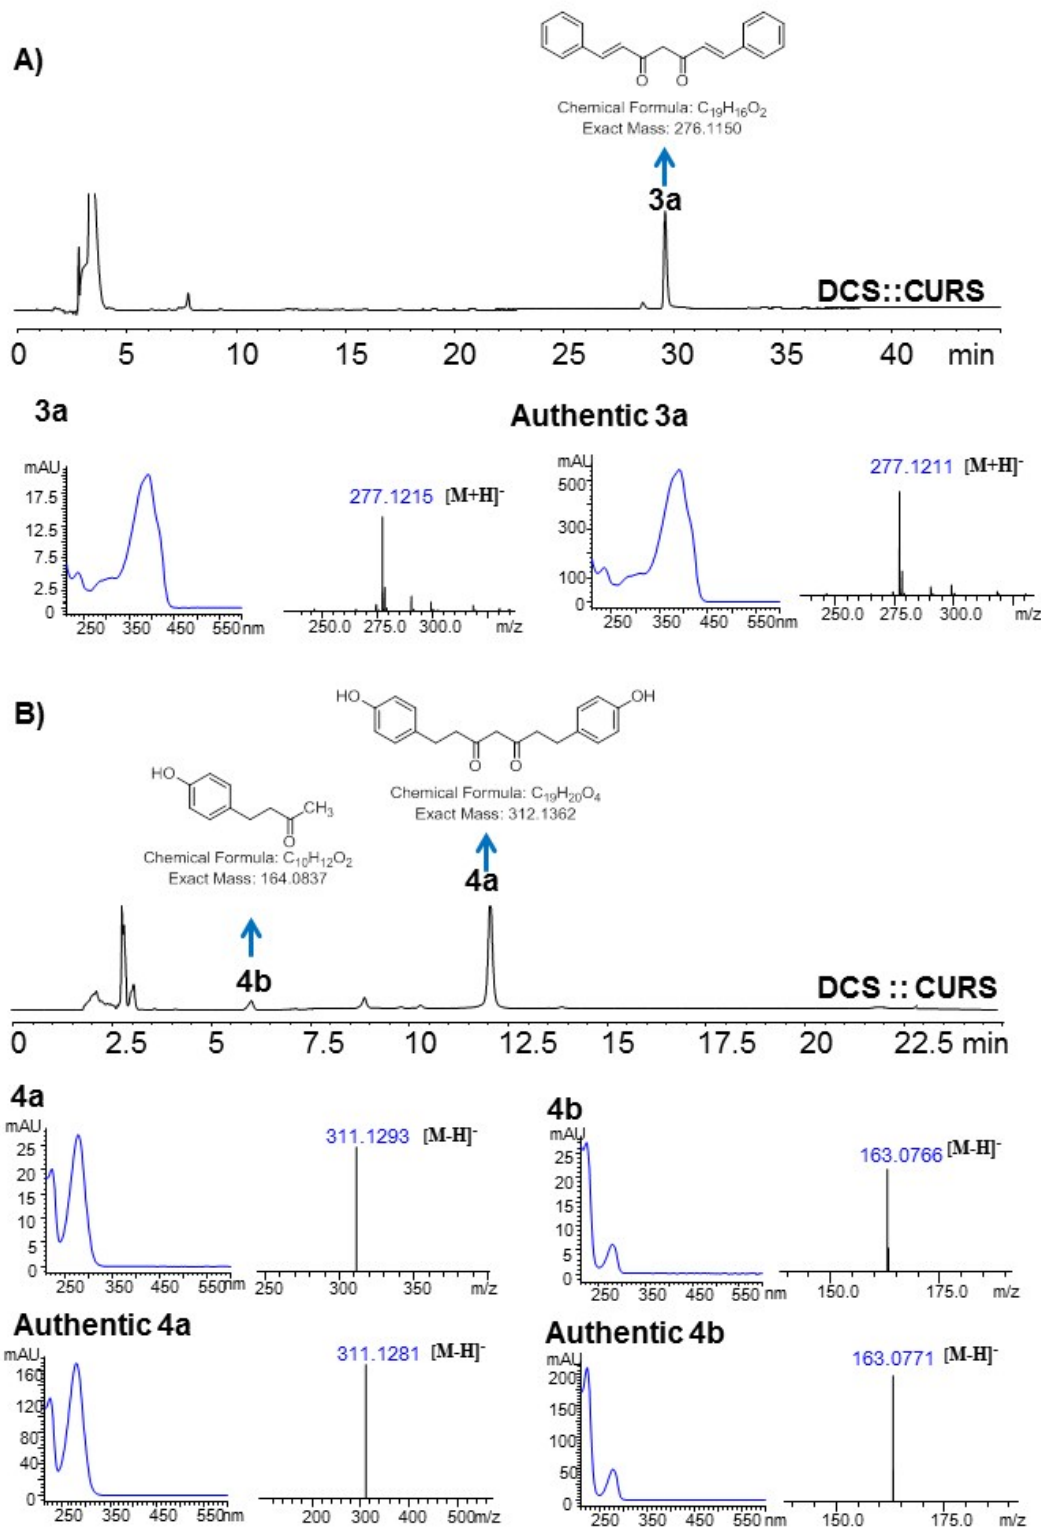

S5 pH (A) and temperature (B) dependence of the fusion protein DCS::CURS (feruloyl-CoA and malonyl-CoA as substrates)

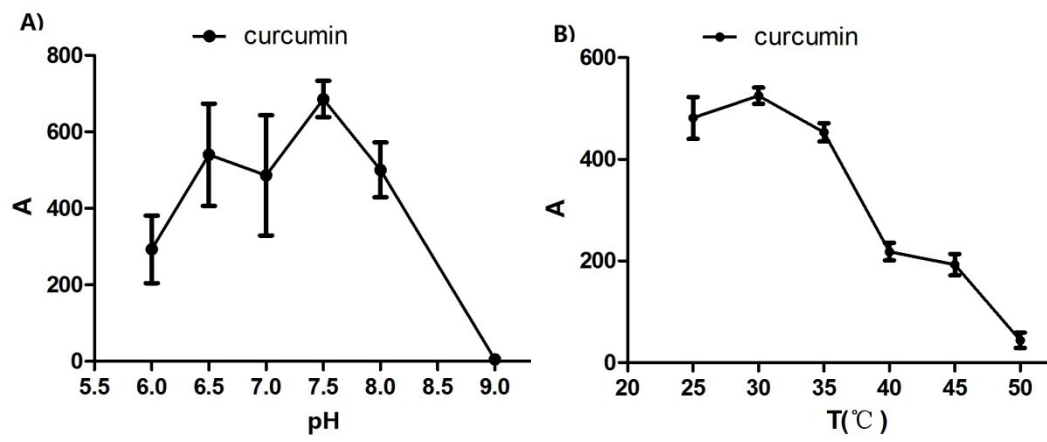

**S6** Time course of the fusion protein DCS::CURS (Left: time course from 5 to 80 min; right: from 60 to 360 min). DCS::CURS was incubated with 100  $\mu$ M feruloyl-CoA and 100  $\mu$ M malonyl-CoA, the major product curcumin and the minor product 3-methoxy-4-hydroxybenzalacetone was monitored by HPLC at 420 nm and 330 nm, respectively. And the two products were quantified using standard compounds. Results are mean  $\pm$  S.E. (n = 4).

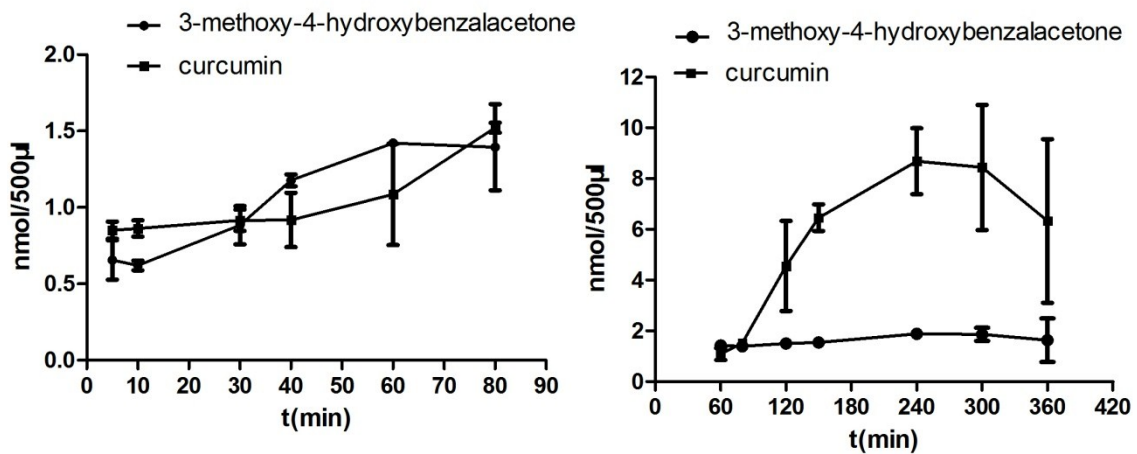

**S7.** The HPLC, UV, and MS spectra for asymmetric diarylheptanoids from (A) feruloyl-CoA, *p*-coumaroyl-CoA, and malonyl-CoA; (B) cinnamoyl-CoA, *p*-coumaroyl-CoA, and malonyl-CoA; (C) feruloyl-CoA, cinnamoyl-CoA, and malonyl-CoA.

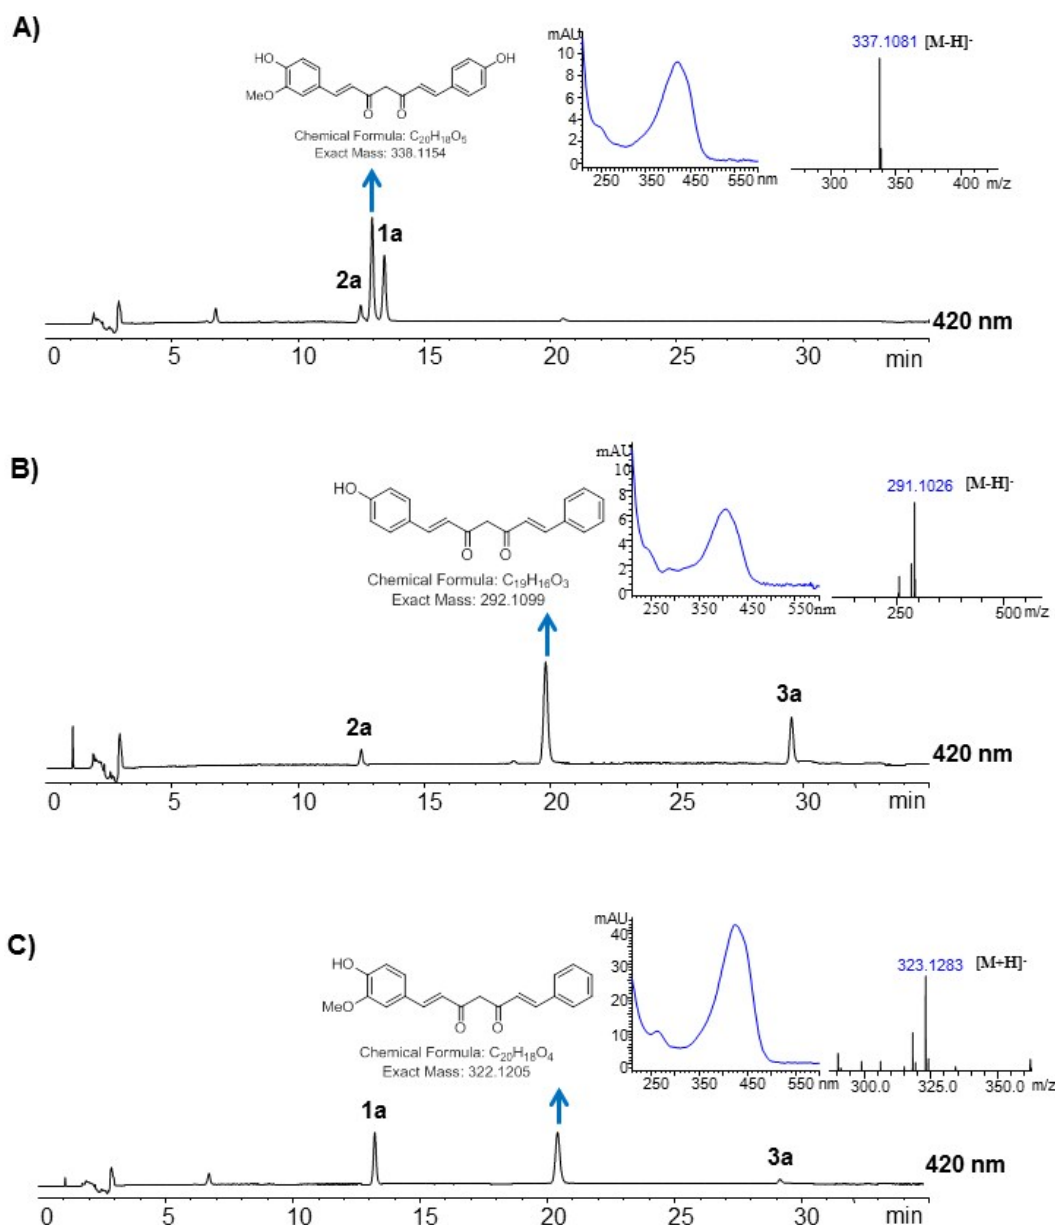

**S8.** The HPLC and MS spectra for asymmetric diarylheptanoids from (A) 3-(4-

hydroxyphenyl) propionyl-CoA, cinnamoyl-CoA, and malonyl-CoA; (B) 3-(4-hydroxyphenyl) propionyl-CoA, feruloyl-CoA, and malonyl-CoA; (C) 3-(4-hydroxyphenyl) propionyl-CoA, *p*-coumaroyl-CoA, and malonyl-CoA.

**A)**

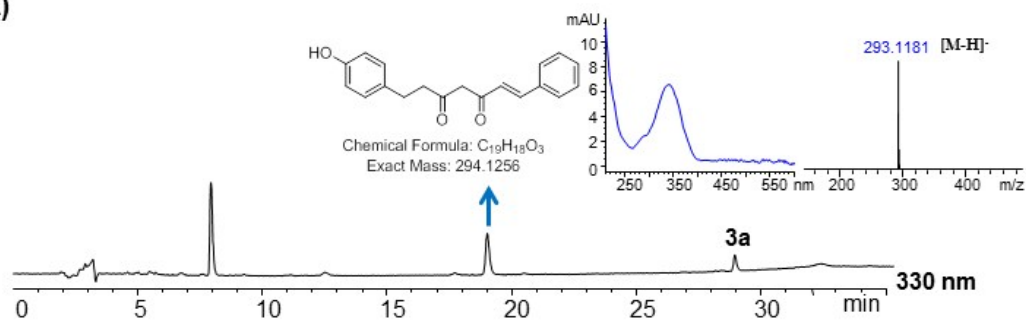

**B)**

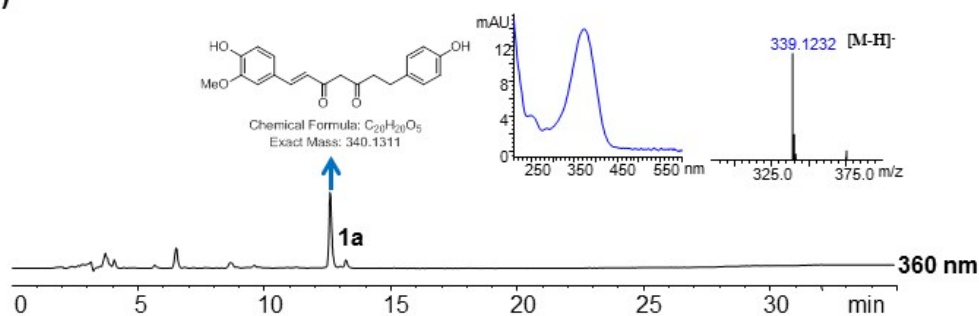

**C)**

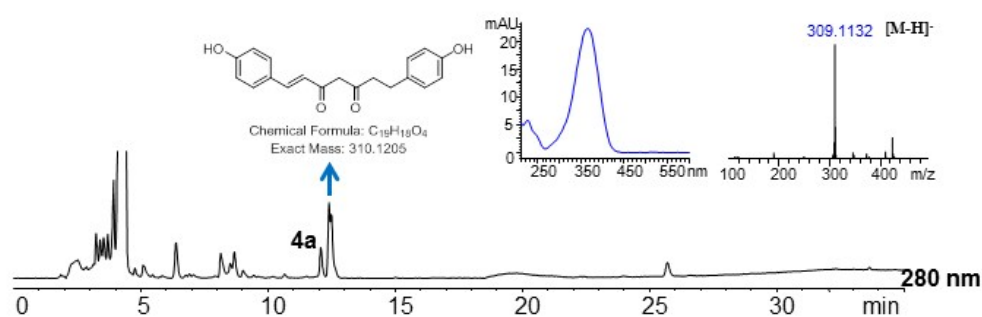

Supplement: c5ra23401h1.pdf [file c5ra23401h1.pdf]
